# Supplementary material
Source: Springer Nature journal article supplement (https://www.springermedizin.de/resource/supplementary/12885_2013_4248_MOESM1_ESM.pdf/9466304)
Supplement: MOESM1 [file 9466304]

First recurrence of platinum-sensitive epithelial ovarian cancer, primary peritoneal cancer or fallopian tube cancer

In-and exclusion criteria

Informed consent

Randomisation (1:1)

Platinum-based  
chemotherapy  
At least six cycles

Secondary  
cytoreductive surgery

Platinum-based  
chemotherapy  
At least six cycles
